# Supplementary material for: Discrimination and Quantification of Glutathione by Cu+-Based Nanozymes
Source: MDPI journal article supplement (doi:10.3390/bios13080827), 2023-08-17
Supplement: s1 [file s1]

# Discrimination and Quantification of Glutathione by Cu<sup>+</sup>-Based Nanozymes

Meixuan Liu <sup>†</sup>, Chen Yan <sup>†</sup>, Qianyun Ye, Xiaohuan Sun <sup>\*</sup> and Jie Han <sup>\*</sup>

School of Chemistry and Chemical Engineering, Yangzhou University, Yangzhou 225002, China;  
mz120210748@stu.yzu.edu.cn (M.L.); 211004123@stu.yzu.edu.cn (C.Y.); mz120200671@stu.yzu.edu.cn (Q.Y.)

<sup>\*</sup> Correspondence: xhuansun@yzu.edu.cn (X.S.); hanjie@yzu.edu.cn (J.H.).

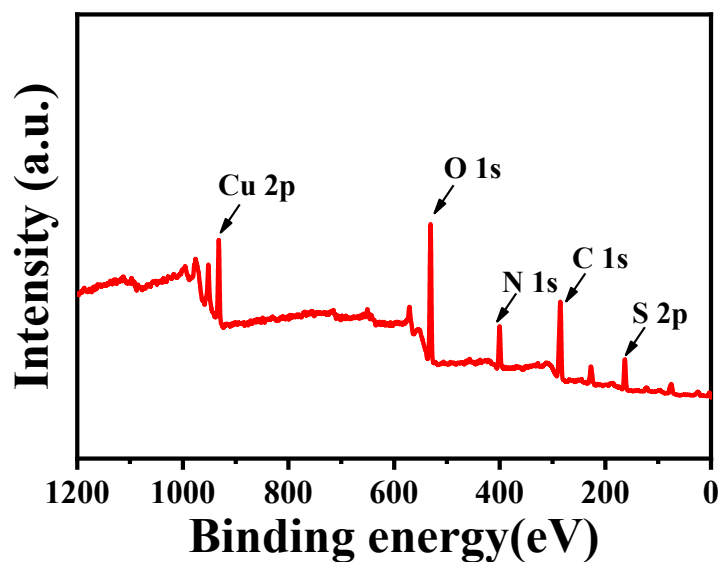

**Figure S1.** The XPS spectrum of Cu(I)-Cys nanoparticles.

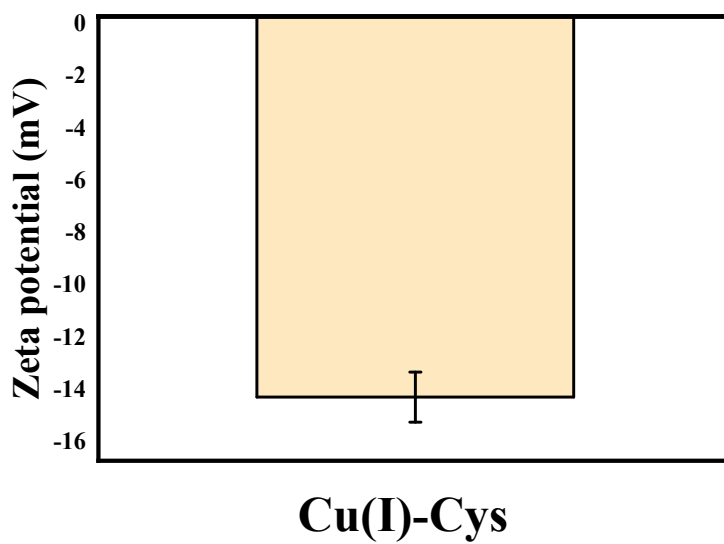

**Figure S2.** Zeta-potential of Cu(I)-Cys nanoparticles.

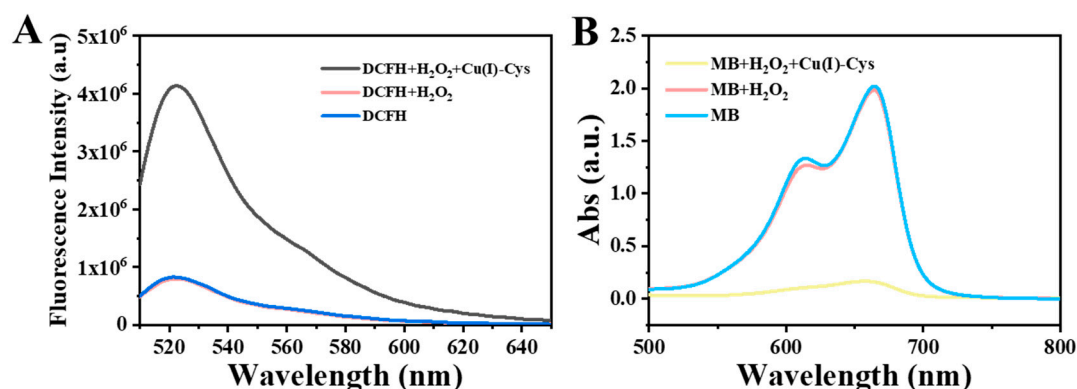

**Figure S3.** (A) The fluorescence spectra of DCFH, DCFH+H<sub>2</sub>O<sub>2</sub> and DCFH+H<sub>2</sub>O<sub>2</sub>+Cu(I)-Cys nanoparticles. The concentration of DCFH, H<sub>2</sub>O<sub>2</sub> and Cu(I)-Cys nanoparticles was kept at 50  $\mu$ g/mL, 50 mM and 100  $\mu$ g/mL, respectively. Reaction time: 5 min. (B) The UV-Vis spectra of MB, MB+H<sub>2</sub>O<sub>2</sub> and Cu(I)-Cys nanoparticles. The concentration of MB, H<sub>2</sub>O<sub>2</sub> and Cu(I)-Cys nanoparticles was kept at 10  $\mu$ g/mL, 50 mM and 100  $\mu$ g/mL, respectively. Reaction time: 90 min.

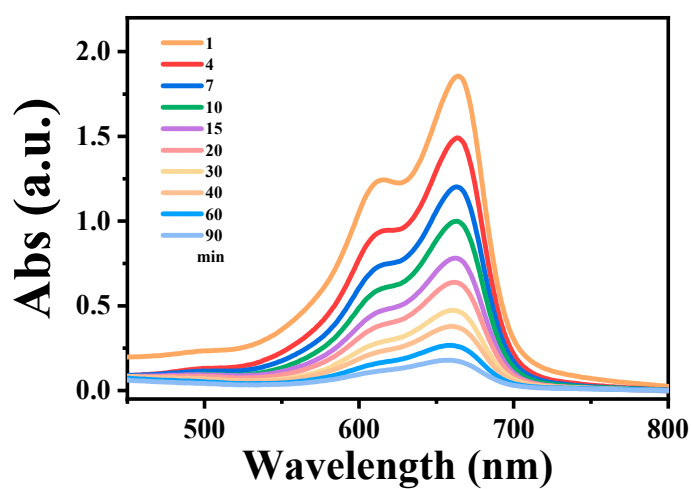

**Figure S4.** The UV-Vis spectra of MB+H<sub>2</sub>O<sub>2</sub> + Cu(I)-Cys nanoparticles as a function of reaction time. The concentration of MB, H<sub>2</sub>O<sub>2</sub> and Cu(I)-Cys nanoparticles was kept at 10  $\mu$ g/mL, 50 mM and 100  $\mu$ g/mL.

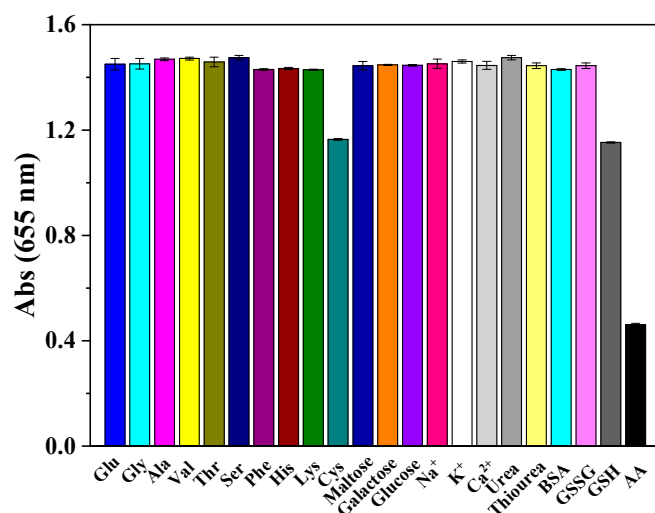

**Figure S5.** The UV-Vis absorption intensity (655 nm) of TMB+H<sub>2</sub>O<sub>2</sub>+Cu(I)-Cys nanoparticles in the presence of Glu, Gly, Ala, Val, Thr, Ser, Phe, His, Lys, Cys, maltose, galactose, glucose, Na<sup>+</sup>, K<sup>+</sup>, Ca<sup>2+</sup>, Urea, thiourea, BSA, GSSG, GSH and AA at pH 4. The concentration of BSA was kept at 25 µg/mL and the concentration of all the other analytes was kept at 25 µM.

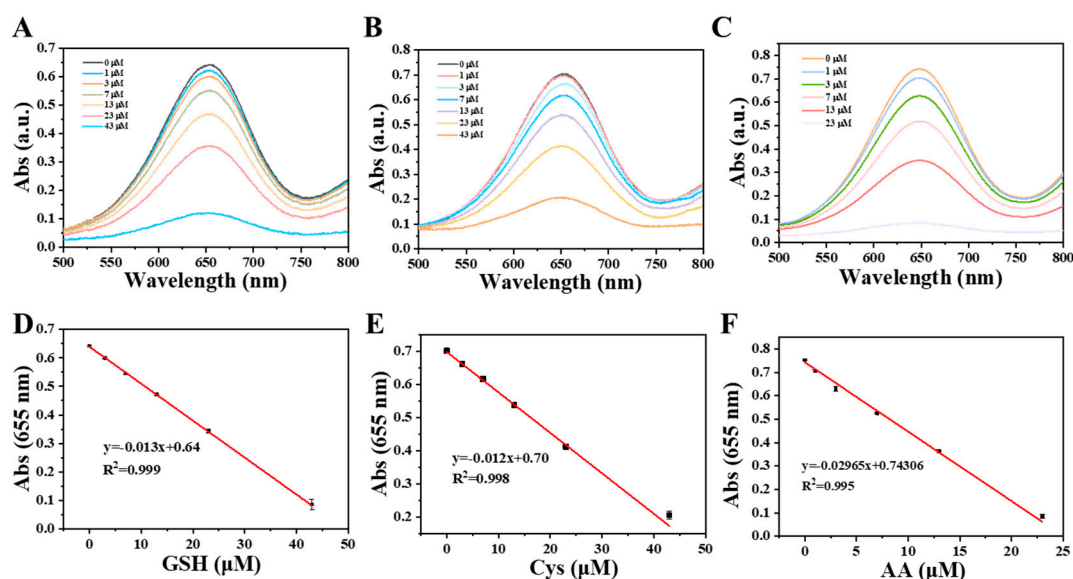

**Figure S6.** The UV-Vis spectra of TMB+H<sub>2</sub>O<sub>2</sub>+Cu(I)-Cys nanoparticles in the presence of various concentrations of (A) GSH, (B) Cys and (C) AA at pH 5. The calibration curve of (D) GSH, (E) Cys and (F) AA at pH 5.

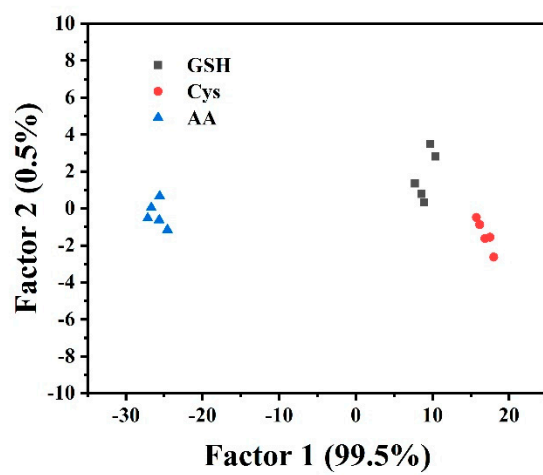

**Figure S7.** The LDA plot for the discrimination of GSH, Cys and AA at 23  $\mu$ M using a Cu(I)-Cys nanoparticles-based sensor array.
